# Supplementary material for: Fast and selective reversed-phase high performance liquid chromatographic separation of UO22+ and Th4+ ions using surface modified C18 silica monolithic supports with target specific ionophoric ligands
Source: Royal Society of Chemistry journal article supplement (doi:10.1039/d2ra07495h), 2023-01-01
Supplement: d2ra07495h1.pdf [file d2ra07495h1.pdf]

*Electronic Supporting Information*

**Fast and Selective Reversed-Phase High-Performance Liquid Chromatographic Separation of  $\text{UO}_2^{2+}$  and  $\text{Th}^{4+}$  Ions using Surface Modified  $\text{C}_{18}$  Silica Monolithic Supports with Target Specific Ionophoric Ligands**

Aswanidevi Kongasseri <sup>1</sup>, Thirumalai Madhesan <sup>1</sup>, Suchashrita Mitra <sup>1</sup>, C V S Brahmmananda Rao <sup>2</sup>, Sivaraman Nagarajan <sup>2</sup>, Pitchaiah Kancharlapalli Chinaraga <sup>2</sup>, Prabhakaran Deivasigamani <sup>1,\*</sup>, Akhila Maheswari Mohan <sup>1,\*</sup>

<sup>1</sup> *Department of Chemistry, School of Advanced Sciences, Vellore Institute of Technology (VIT), Vellore, Tamil Nadu 632014, India*

<sup>2</sup> *Fuel Chemistry Division, Materials Chemistry and Metal Fuel Cycle Group, Indira Gandhi Centre for Atomic Research (IGCAR), Kalpakkam, Tamil Nadu 603102, India*

---

| <b>Table of Contents</b> |                                                                    |
|--------------------------|--------------------------------------------------------------------|
| Fig. S1                  | <sup>1</sup> H NMR spectrum of HBBTA                               |
| Fig. S2                  | <sup>13</sup> C NMR spectrum of HBBTA                              |
| Fig. S3                  | FT-IR spectrum of HBBTA                                            |
| Fig. S4                  | <sup>1</sup> H NMR spectrum of HHBTA                               |
| Fig. S5                  | <sup>13</sup> C NMR spectrum of HHBTA                              |
| Fig. S6                  | FT-IR spectrum of HHBTA                                            |
| Fig. S7                  | <sup>1</sup> H NMR spectrum of HOBTA                               |
| Fig. S8                  | <sup>13</sup> C NMR spectrum of HOBTA                              |
| Fig. S9                  | FT-IR spectrum of HOBTA                                            |
| Fig. S10                 | <sup>1</sup> H NMR spectrum of HDBTA                               |
| Fig. S11                 | <sup>13</sup> C NMR spectrum of HDBTA                              |
| Fig. S12                 | FT-IR spectrum of HDBTA                                            |
| Table. S1                | Exact amount of the modifiers adsorbed onto the monolithic support |
| Table. S2                | Optimized chromatographic conditions                               |

I.  $^1\text{H}$  &  $^{13}\text{C}$  NMR & FT-IR spectra of HBBTA

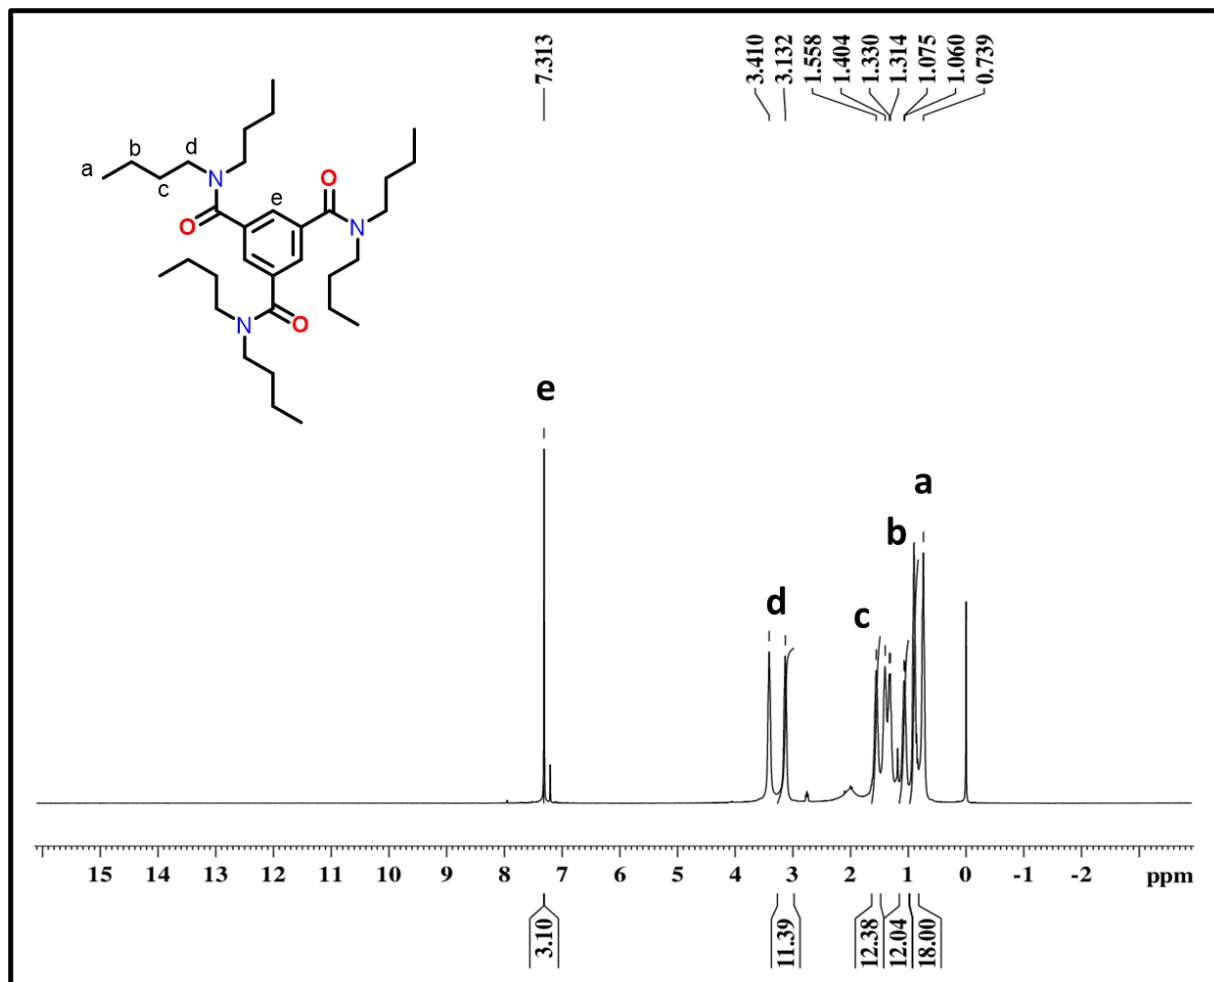

Fig. S1  $^1\text{H}$  NMR spectrum of HBBTA

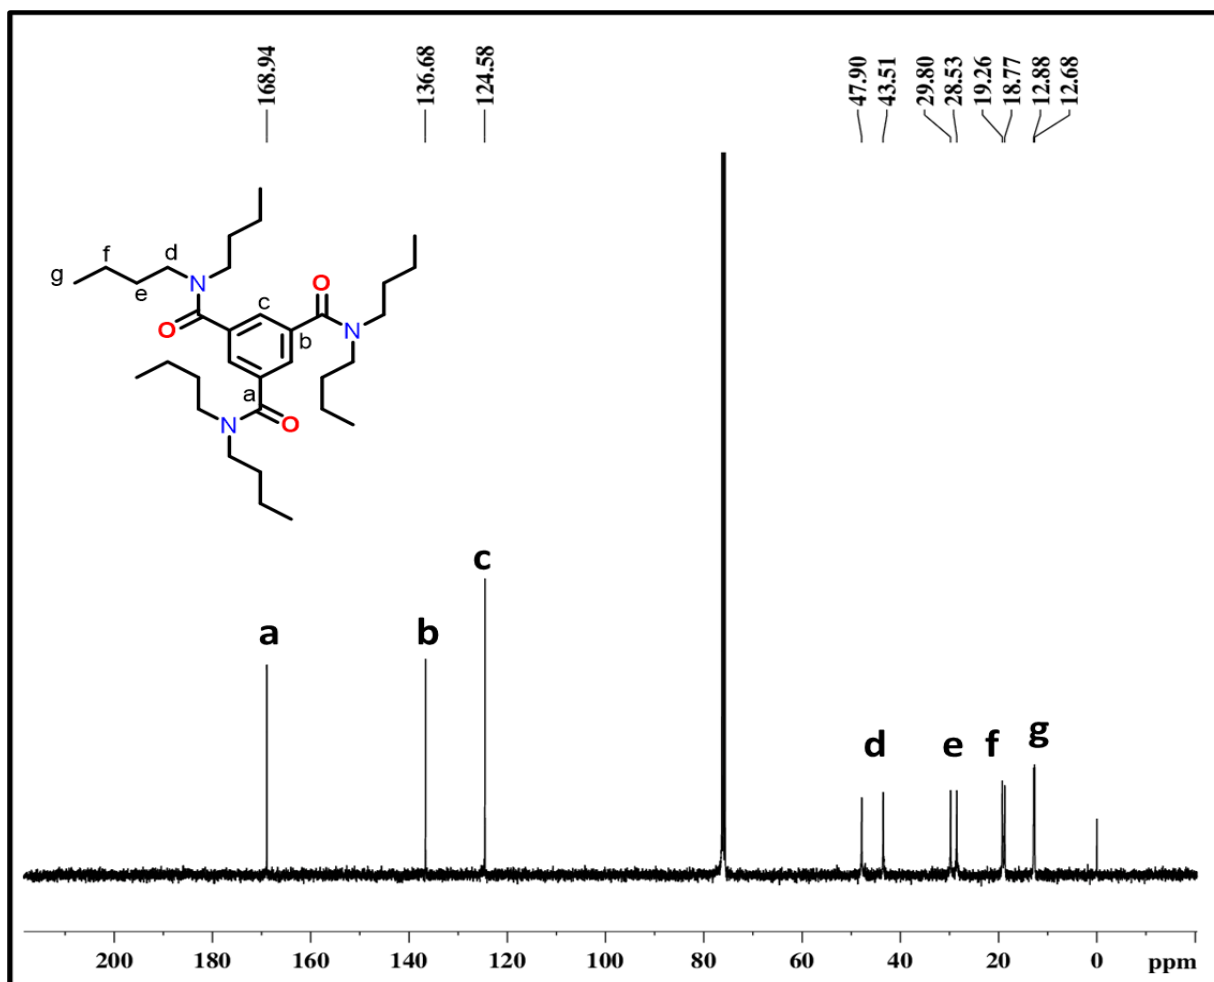

Fig. S2  $^{13}\text{C}$  NMR spectrum of HBBTA

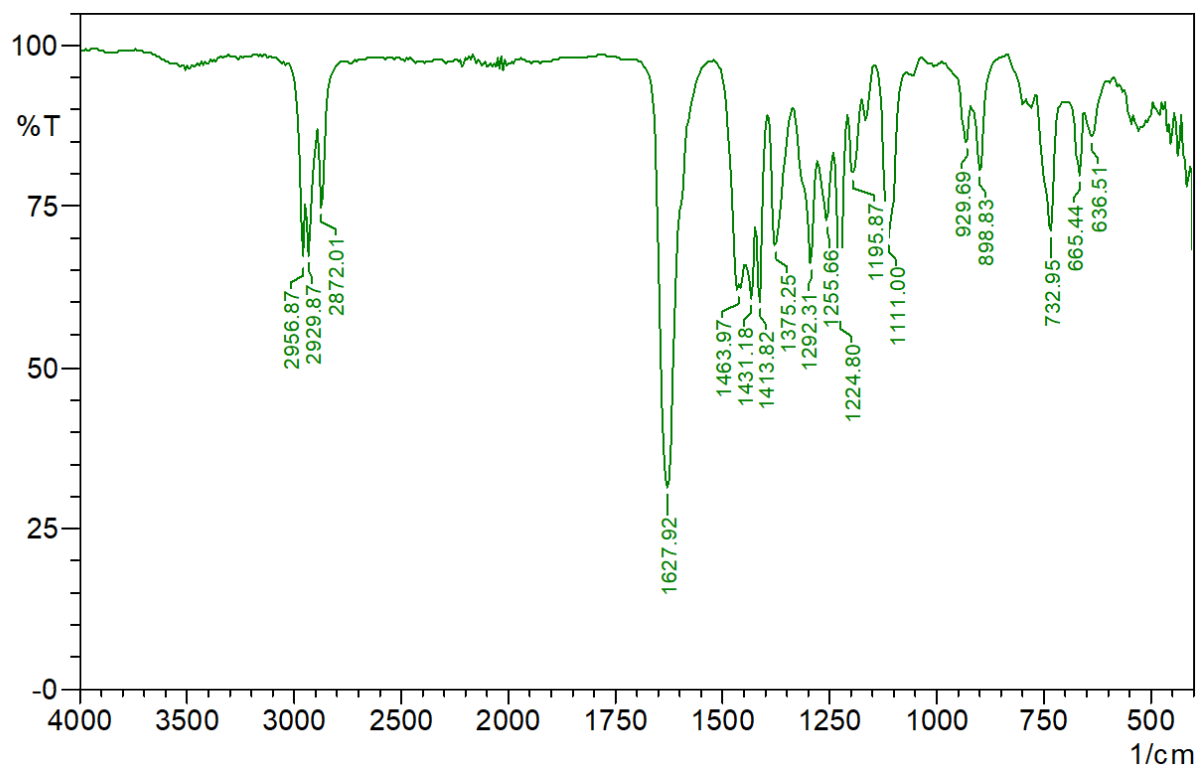

Fig. S3 FT-IR spectrum of HBBTA

## II. $^1\text{H}$ & $^{13}\text{C}$ NMR & FT-IR spectra of HHBTA

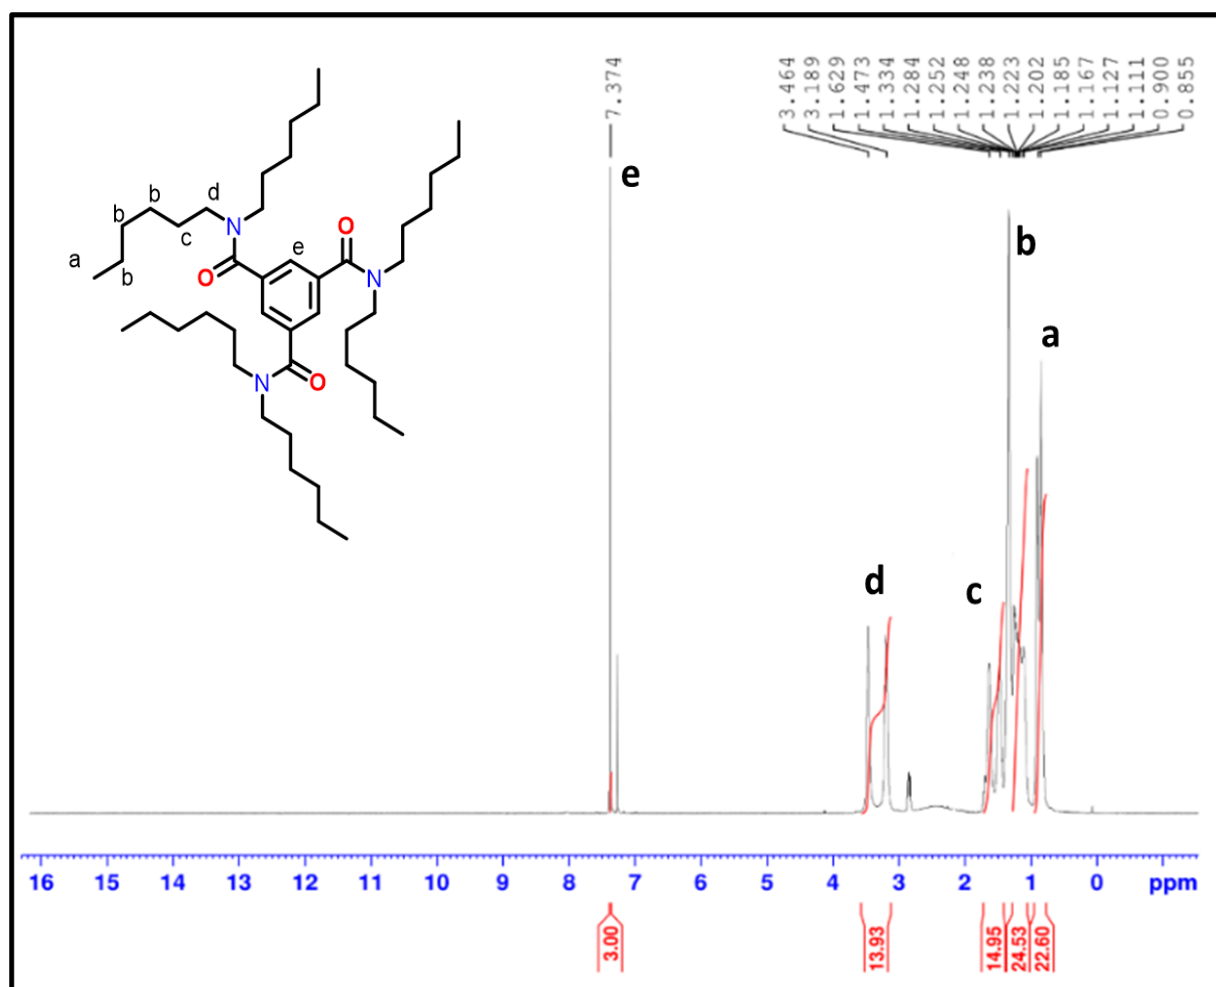

Fig. S4  $^1\text{H}$  NMR spectrum of HHBTA

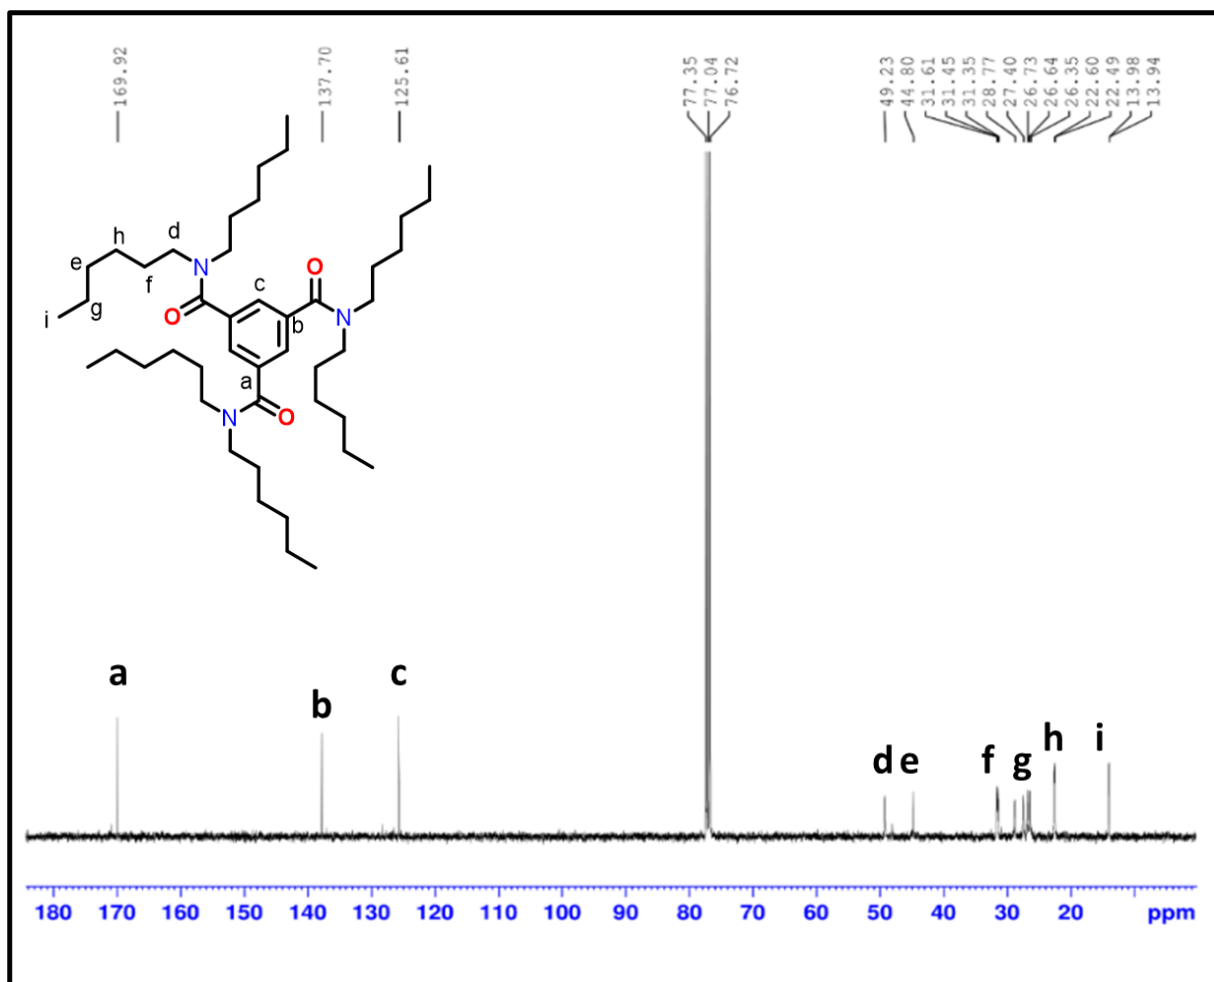

**Fig. S5**  $^{13}\text{C}$  NMR spectrum of HHBTA

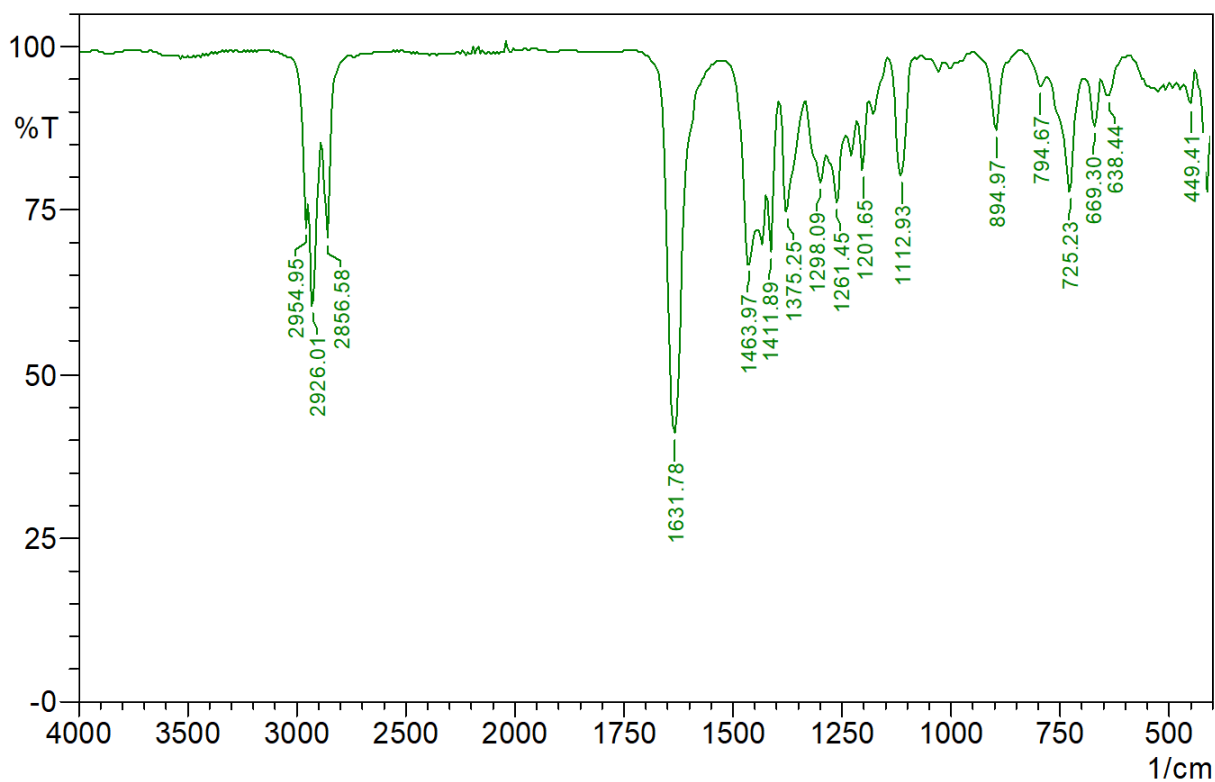

**Fig. S6** FT-IR spectrum of HHBTA

### III. $^1\text{H}$ & $^{13}\text{C}$ NMR & FT-IR spectra of HOBTAs

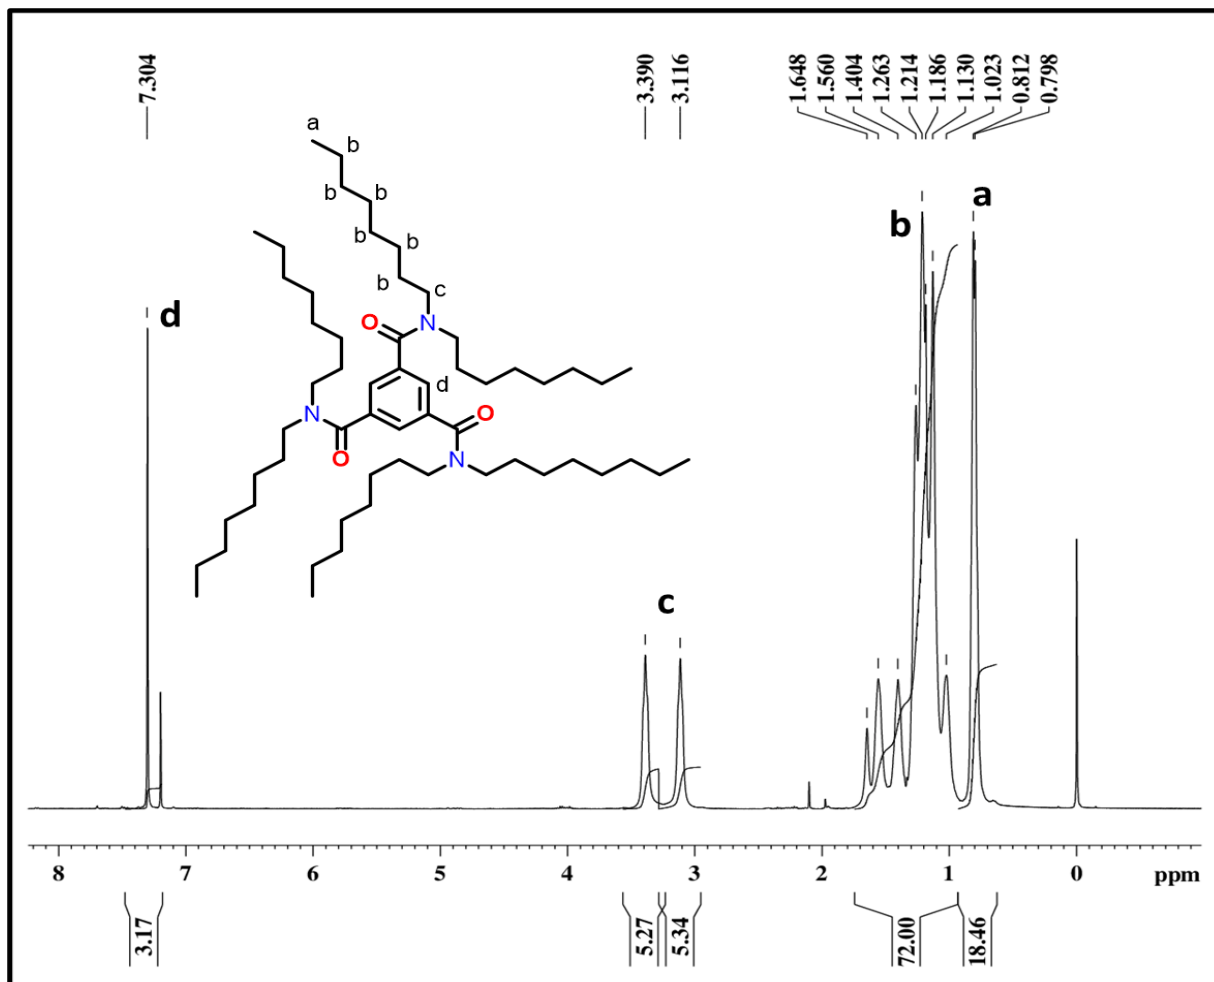

Fig. S7  $^1\text{H}$  NMR spectrum of HOBTAs

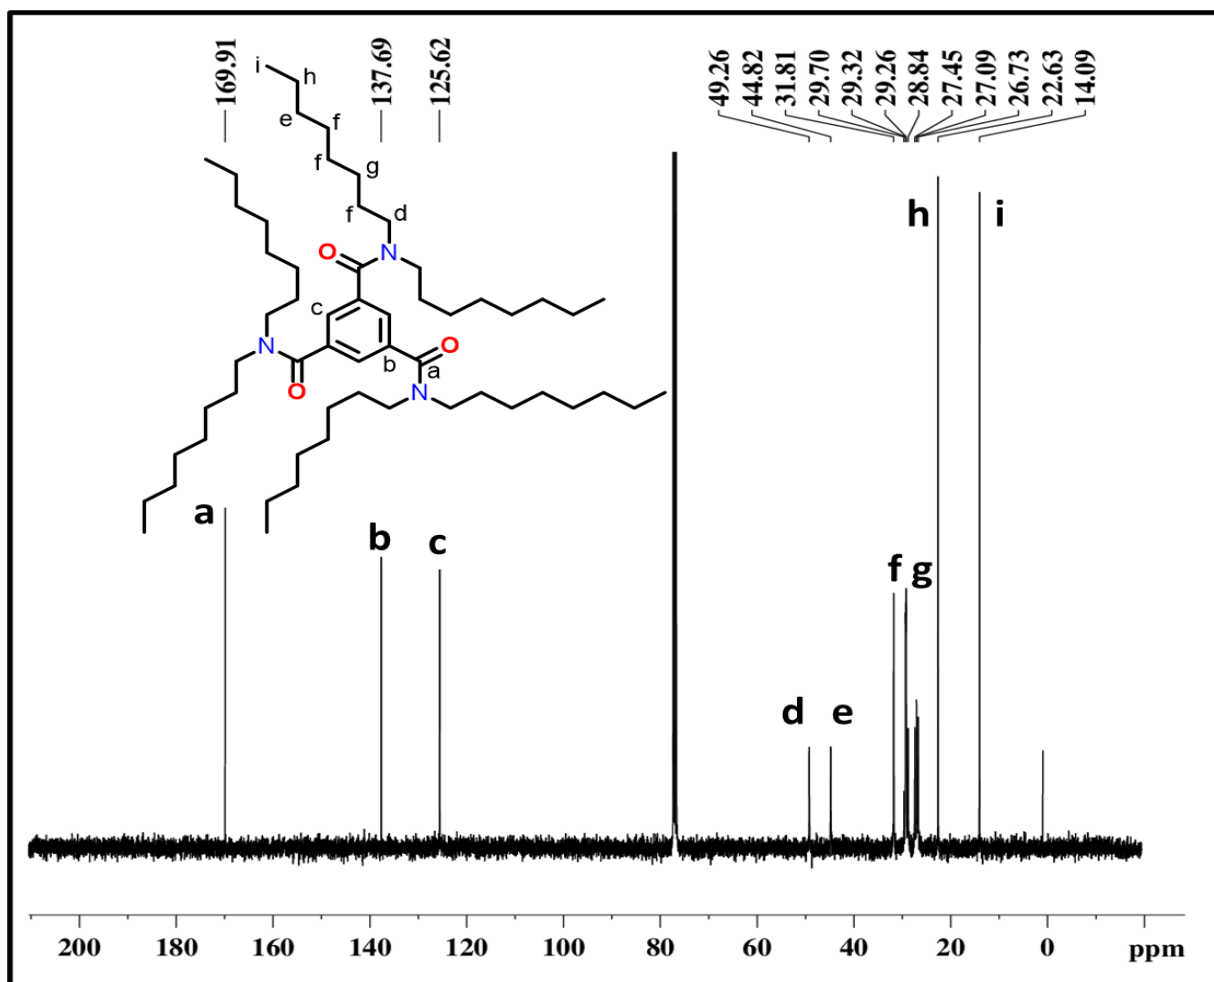

Fig. S8 <sup>13</sup>C NMR spectrum of HOBTA

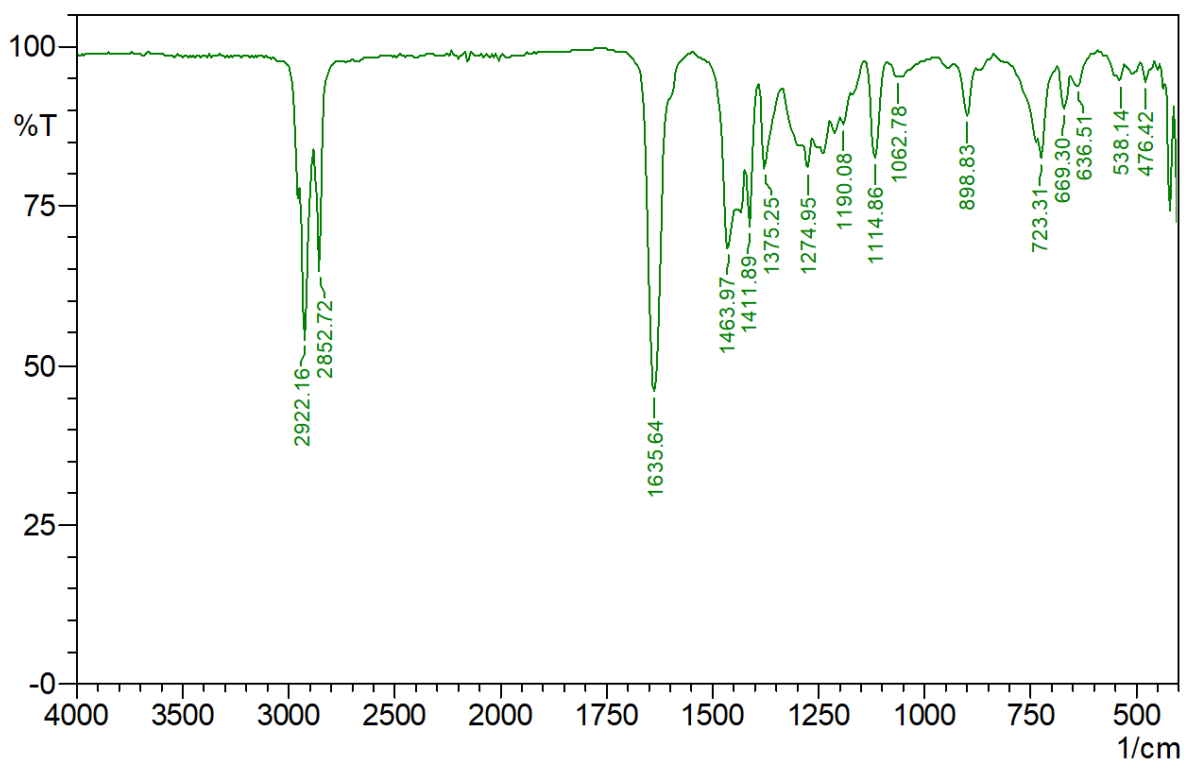

Fig. S9 FT-IR spectrum of HOBTA

IV.  $^1\text{H}$  &  $^{13}\text{C}$  NMR & FT-IR spectra of HDBTA

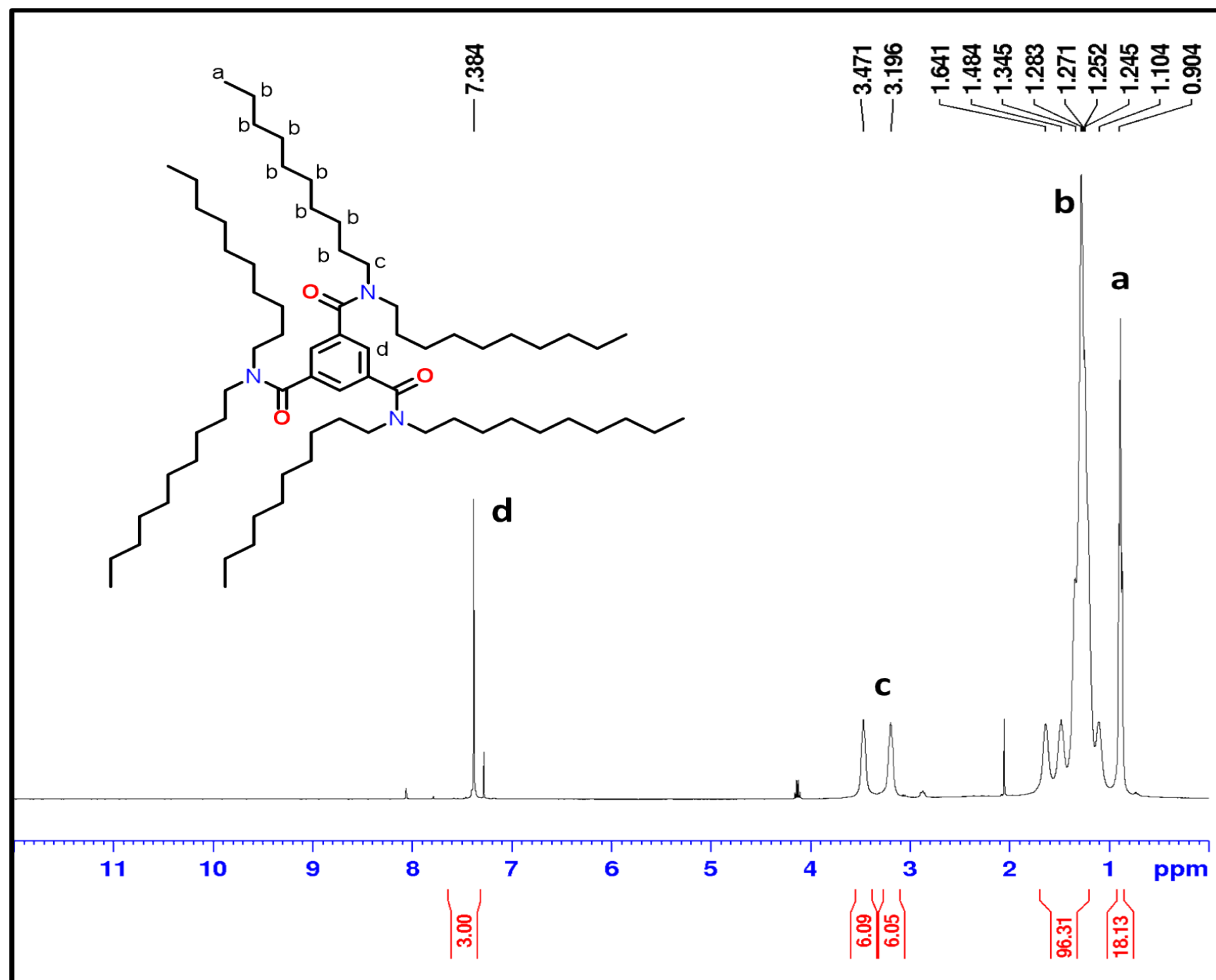

Fig. S10  $^1\text{H}$  NMR spectrum of HDBTA



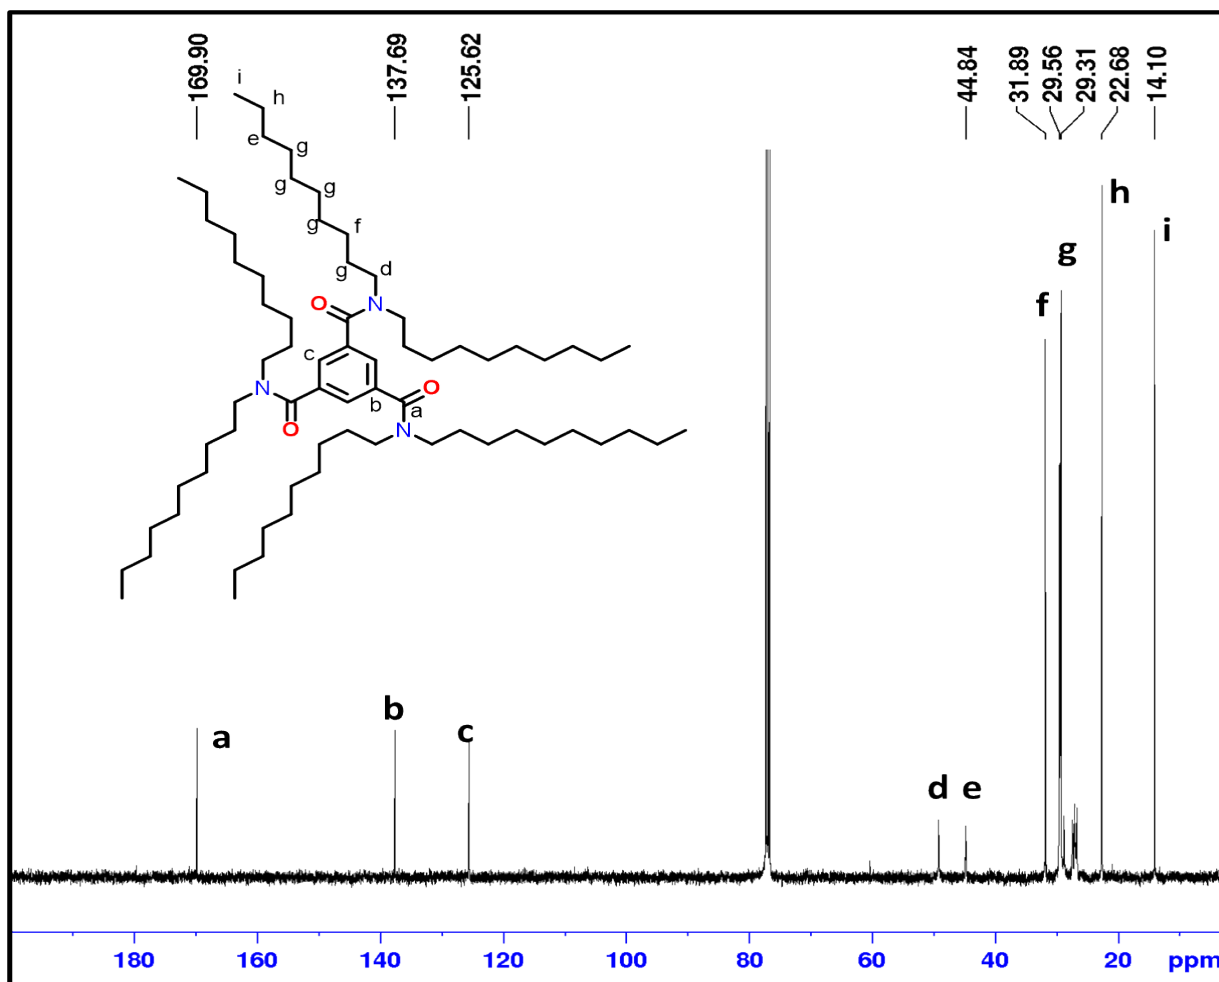

Fig. S11 <sup>13</sup>C NMR spectrum of HDBTA

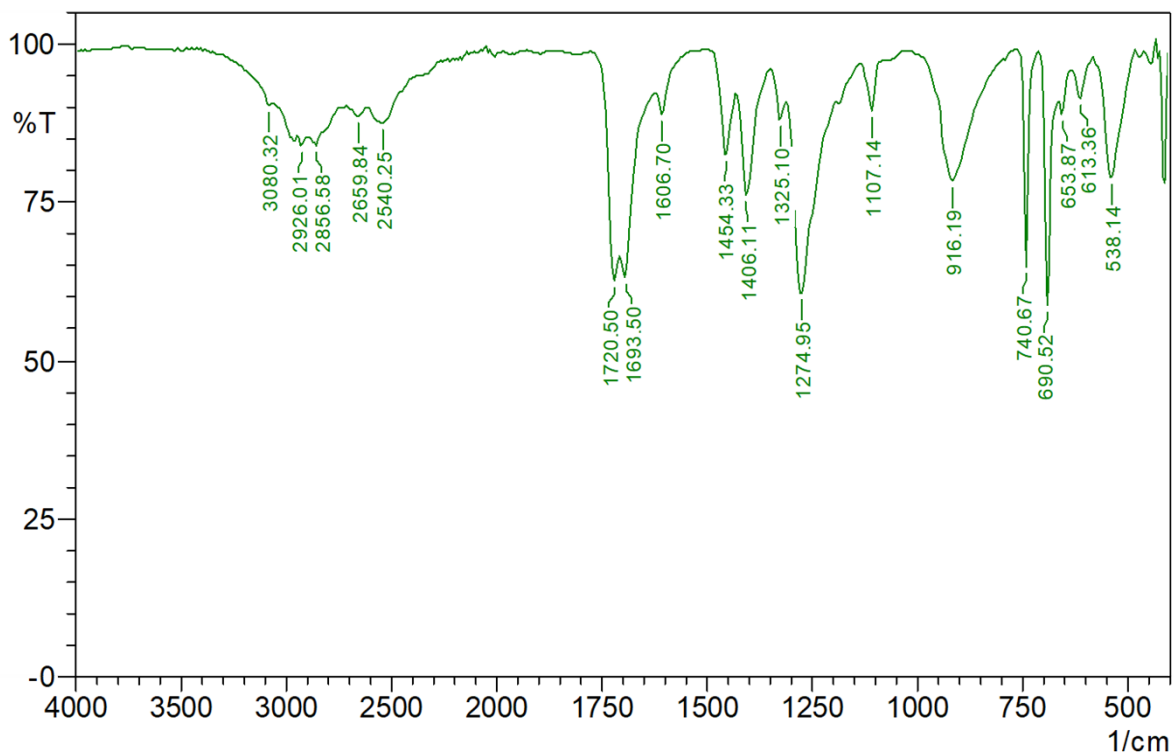

Fig. S12 FT-IR spectrum of HDBTA

**Table S1.** Exact amount of the modifiers adsorbed onto the monolithic support.

| Column Modifier | Initial amount of column modifiers (mmol) | MeOH:H <sub>2</sub> O (v/v) | Amount of modifier coated (mmol) |
|-----------------|-------------------------------------------|-----------------------------|----------------------------------|
| <b>HBBTA</b>    | 0.10                                      | 75:25                       | 0.06                             |
|                 | 0.25                                      | 76:24                       | 0.08                             |
|                 | 0.50                                      | 78:22                       | 0.13                             |
|                 | <b>1.50</b>                               | <b>73:27</b>                | <b>0.17</b>                      |
| <b>HHBTA</b>    | <b>0.10</b>                               | <b>78:22</b>                | <b>0.07</b>                      |
|                 | 0.25                                      | 78:22                       | 0.09                             |
|                 | 0.50                                      | 78:22                       | 0.14                             |
| <b>HOBTA</b>    | 0.10                                      | 89:11                       | 0.03                             |
|                 | 0.20                                      | 93:7                        | 0.05                             |
|                 | <b>0.50</b>                               | <b>92:8</b>                 | <b>0.07</b>                      |
| <b>HDBTA</b>    | 0.01                                      | 95:5                        | 0.006                            |
|                 | 0.025                                     | 93:7                        | 0.012                            |
|                 | <b>0.1</b>                                | <b>92:8</b>                 | <b>0.023</b>                     |

**Table S2.** Optimized chromatographic conditions

|                        |                                                                                                                                                                                                                                                                                                                                                                                                                                                                                                                                                                                                                                                                                                                                                                                                      |
|------------------------|------------------------------------------------------------------------------------------------------------------------------------------------------------------------------------------------------------------------------------------------------------------------------------------------------------------------------------------------------------------------------------------------------------------------------------------------------------------------------------------------------------------------------------------------------------------------------------------------------------------------------------------------------------------------------------------------------------------------------------------------------------------------------------------------------|
| HPLC system            | JASCO LC 4000 Plus                                                                                                                                                                                                                                                                                                                                                                                                                                                                                                                                                                                                                                                                                                                                                                                   |
| Column                 | C <sub>18</sub> silica monolithic column (RP18e, 100 × 4.6 mm, Merck-Chromolith high-resolution)                                                                                                                                                                                                                                                                                                                                                                                                                                                                                                                                                                                                                                                                                                     |
| Column temperature     | Ambient                                                                                                                                                                                                                                                                                                                                                                                                                                                                                                                                                                                                                                                                                                                                                                                              |
| Column modifier        | <i>N</i> <sup>1</sup> , <i>N</i> <sup>1</sup> , <i>N</i> <sup>3</sup> , <i>N</i> <sup>3</sup> , <i>N</i> <sup>5</sup> , <i>N</i> <sup>5</sup> -hexa(butyl)benzene-1,3,5-tricarboxamide (HBBTA)<br><i>N</i> <sup>1</sup> , <i>N</i> <sup>1</sup> , <i>N</i> <sup>3</sup> , <i>N</i> <sup>3</sup> , <i>N</i> <sup>5</sup> , <i>N</i> <sup>5</sup> -hexa(hexyl)benzene-1,3,5-tricarboxamide (HHBTA)<br><i>N</i> <sup>1</sup> , <i>N</i> <sup>1</sup> , <i>N</i> <sup>3</sup> , <i>N</i> <sup>3</sup> , <i>N</i> <sup>5</sup> , <i>N</i> <sup>5</sup> -hexa(octyl)benzene-1,3,5-tricarboxamide (HOBTA)<br><i>N</i> <sup>1</sup> , <i>N</i> <sup>1</sup> , <i>N</i> <sup>3</sup> , <i>N</i> <sup>3</sup> , <i>N</i> <sup>5</sup> , <i>N</i> <sup>5</sup> -hexa(decyl)benzene-1,3,5-tricarboxamide (HDBTA) |
| Optimum probe content  | 0.17 mM HBBTA, 0.07 mM HHBTA & HOBTA, 0.023 mM HDBTA                                                                                                                                                                                                                                                                                                                                                                                                                                                                                                                                                                                                                                                                                                                                                 |
| Mobile phase           | 0.1 M of 2-hydroxyisobutyric acid ( $\alpha$ -HIBA, pH 2.5)                                                                                                                                                                                                                                                                                                                                                                                                                                                                                                                                                                                                                                                                                                                                          |
| Mobile phase flow rate | 1 mL/min                                                                                                                                                                                                                                                                                                                                                                                                                                                                                                                                                                                                                                                                                                                                                                                             |
| Sample volume          | 20 $\mu$ L                                                                                                                                                                                                                                                                                                                                                                                                                                                                                                                                                                                                                                                                                                                                                                                           |
| PCR                    | 0.015 mM of Arsenazo(III) (pH 7.0)                                                                                                                                                                                                                                                                                                                                                                                                                                                                                                                                                                                                                                                                                                                                                                   |
| PCR flow rate          | 1.5 mL/min                                                                                                                                                                                                                                                                                                                                                                                                                                                                                                                                                                                                                                                                                                                                                                                           |
| Detector               | JASCO UV-4070                                                                                                                                                                                                                                                                                                                                                                                                                                                                                                                                                                                                                                                                                                                                                                                        |
| Wavelength             | 665 nm                                                                                                                                                                                                                                                                                                                                                                                                                                                                                                                                                                                                                                                                                                                                                                                               |
